# Supplementary material
Source: Royal Society of Chemistry journal article supplement (doi:10.1039/d6tb00571c)
Supplement: d6tb00571c1.pdf [file d6tb00571c1.pdf]

## Supporting Information

### Functionally Graded Bilayer Polyurethane Sponge with Sequential Stage-Adaptive Capabilities for Full-Cycle Repair of Infected Wounds

Qiusheng Wang, Chongyang Mai, Yue Li, Yunpeng Wang, Bin He\*

National Engineering Research Center for Biomaterials, College of Biomedical Engineering, Sichuan University, Chengdu 610065, China

\* Corresponding author: bhe@scu.edu.cn

**Table S1.** Synthetic formulae of PUS and PUF.

|     | PEG2k (g) | PLA2k (g) | Glycerol (g) | H <sub>2</sub> O (g) | Tween80 (g) | HDI (g) |
|-----|-----------|-----------|--------------|----------------------|-------------|---------|
| PUS | 12        | 8         | 0            | 0                    | 0           | 1.85    |
| PUF | 12        | 8         | 1.35         | 0.33                 | 0.25        | 9.3     |

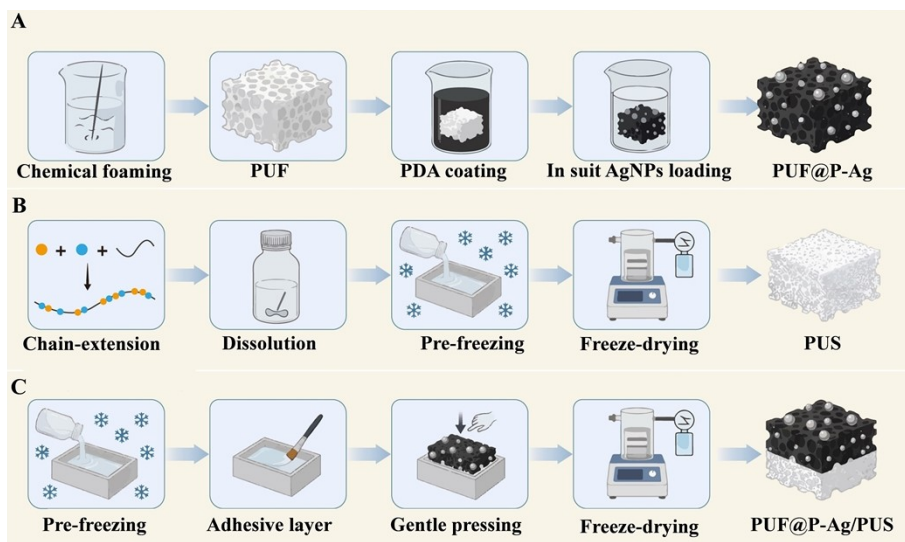

**Figure S1.** Illustration of sponges fabrication.

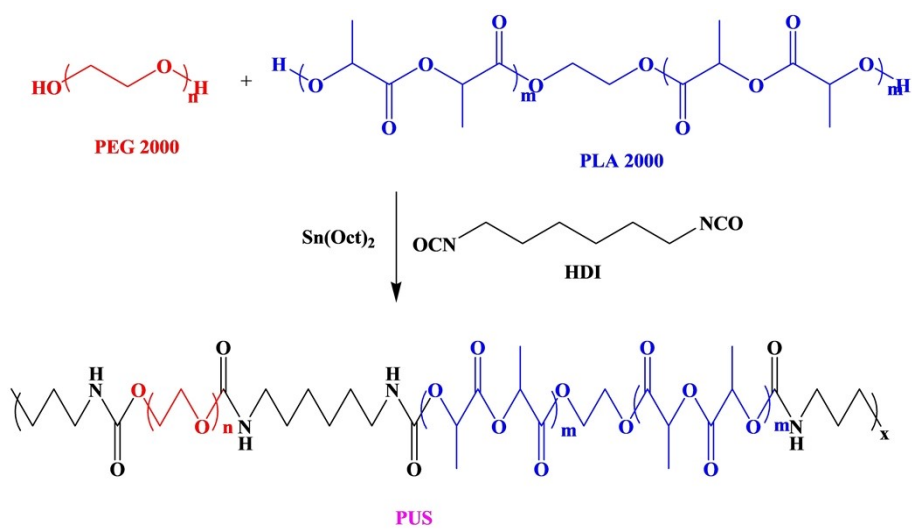

**Figure S2.** Synthetic route of PUS.

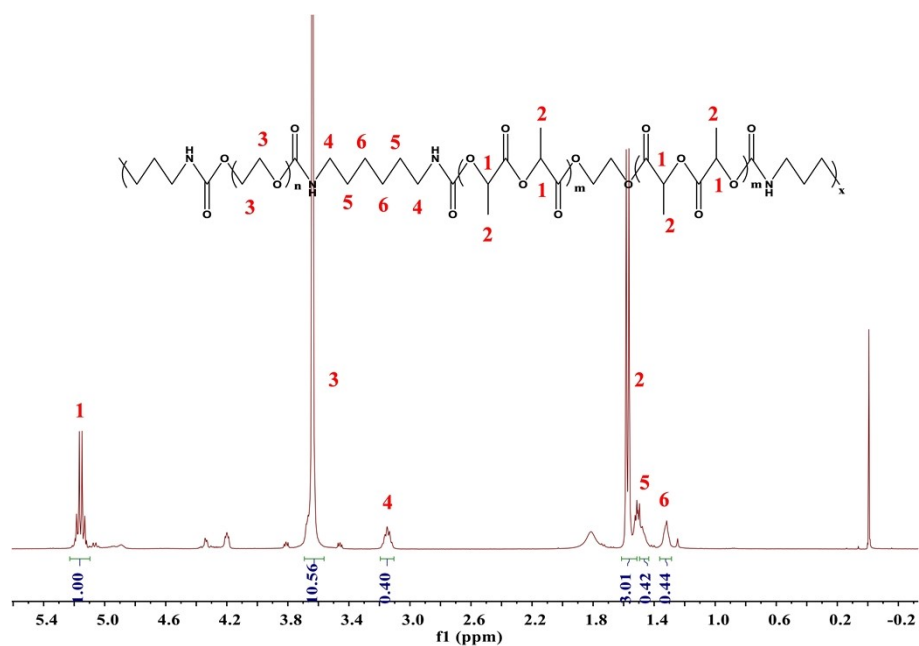

**Figure S3.** <sup>1</sup>H NMR spectrum of PUS.

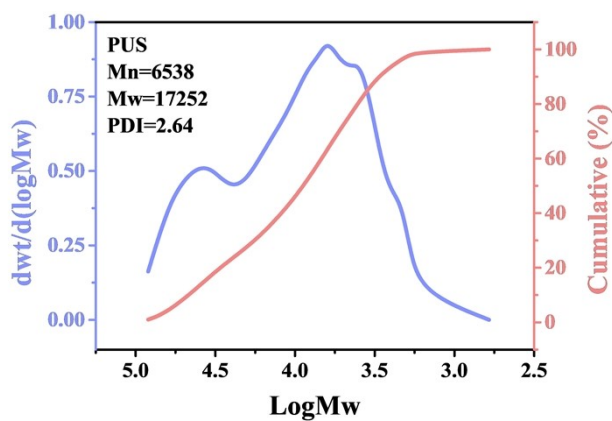

**Figure S4.** Gel permeation chromatography (GPC) of PUS.

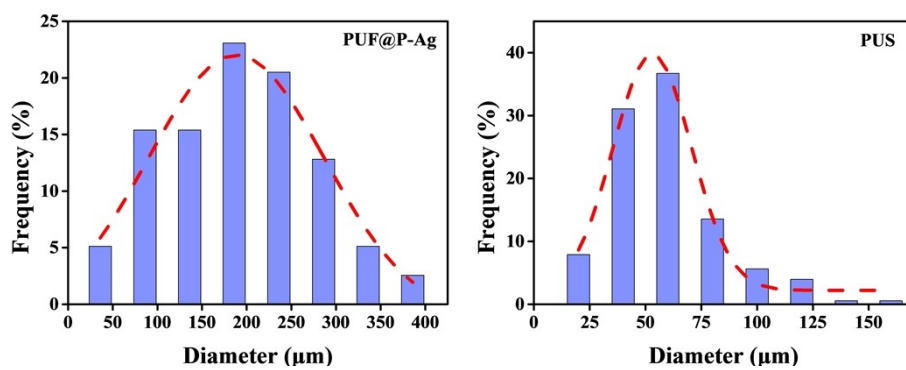

**Figure S5.** Pore size distribution of PUF@P-Ag and PUS.

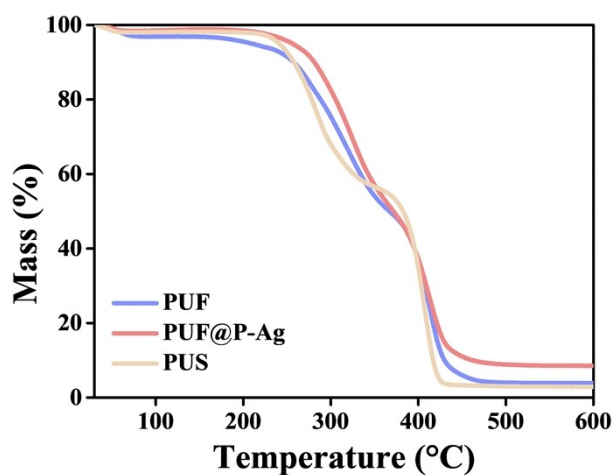

Figure S6. TGA curves of PUF, PUF@P-Ag, and PUS.

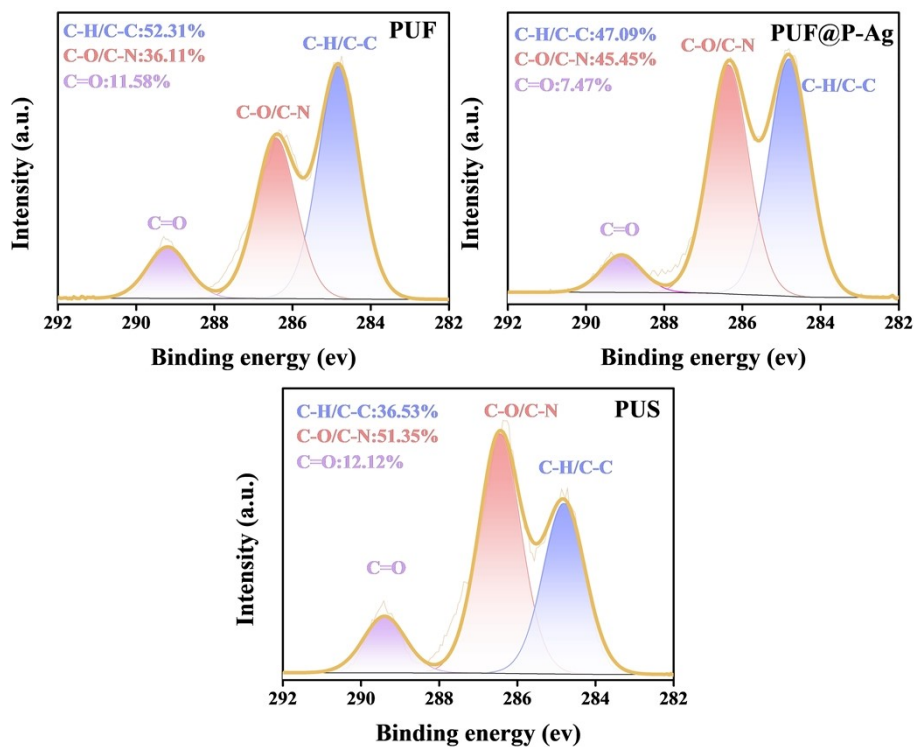

Figure S7. C1s high-resolution spectra of PUF, PUF@P-Ag, and PUS in XPS analysis.

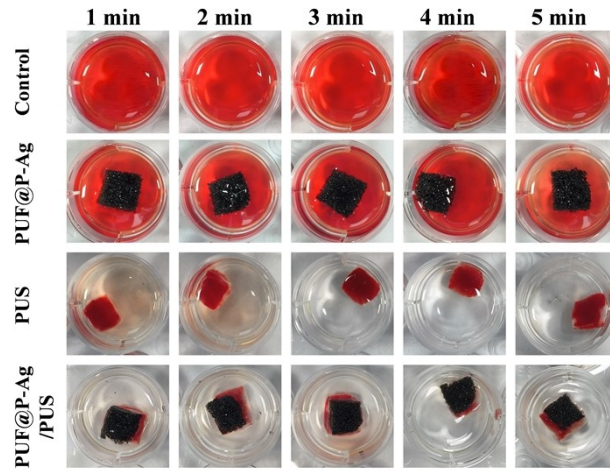

**Figure S8.** Images of PUF@P-Ag, PUS, and PUF@P-Ag/PUS sponges in BCI tests.

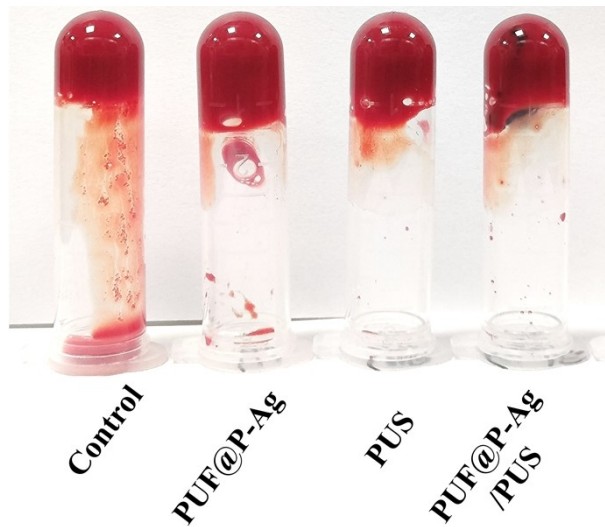

**Figure S9.** Images of PUF@P-Ag, PUS, and PUF@P-Ag/PUS sponges in BCT tests.

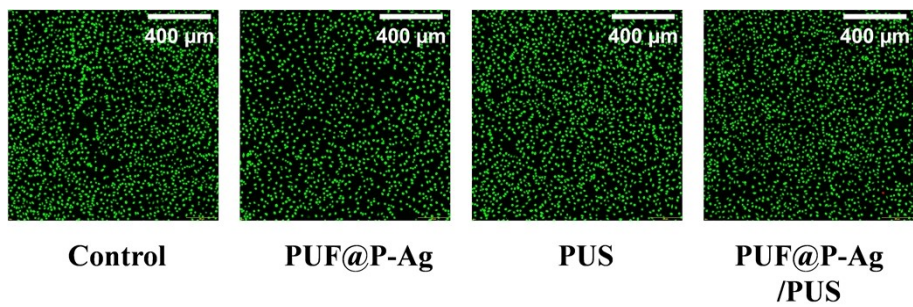

**Figure S10.** Live/dead cell staining following treatment with PUF@P-Ag, PUS, and PUF@P-Ag/PUS sponges.

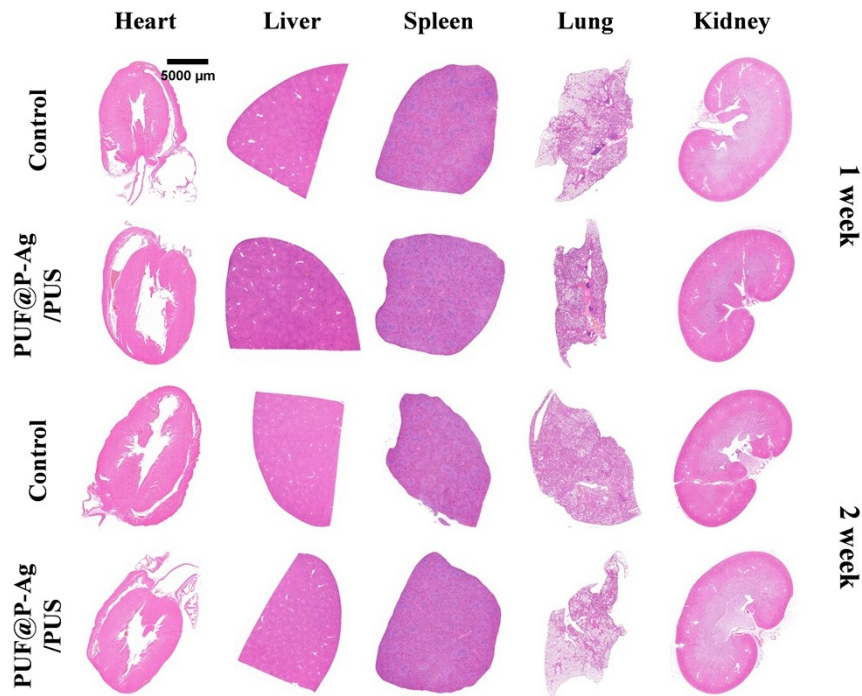

**Figure S11.** Histopathological analysis of organs at 1 and 2 weeks post-implantation.

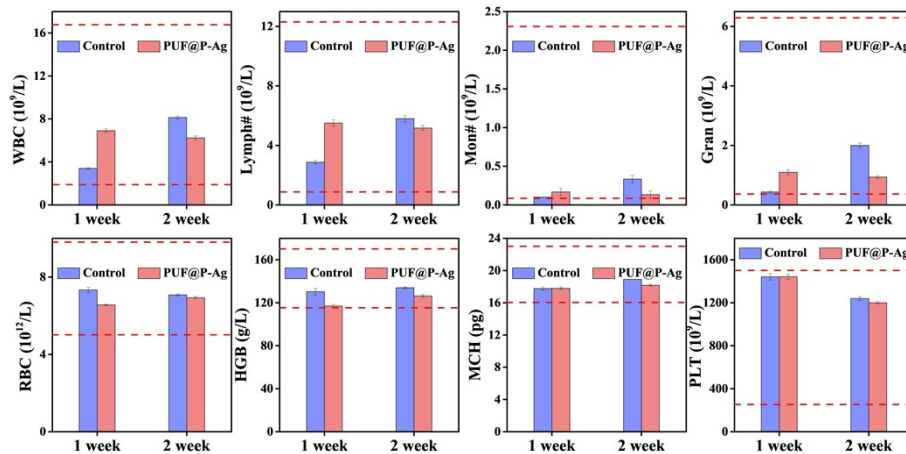

**Figure S12.** Analysis of complete blood count at 1 and 2 weeks post-implantation.

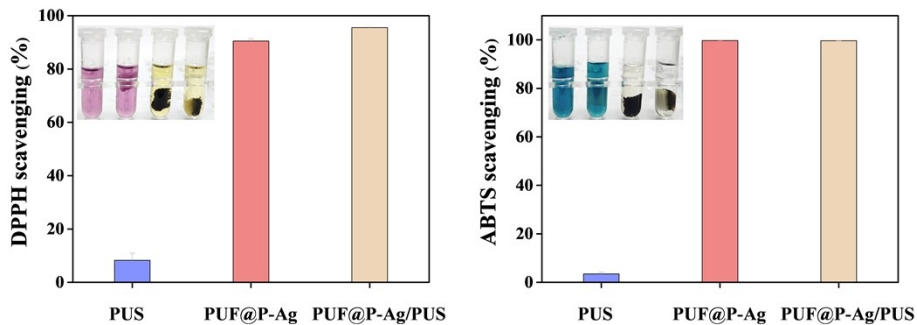

**Figure S13.** Free radical scavenging by PUS, PUF@P-Ag, and PUF@P-Ag/PUS sponges against DPPH and ABTS.

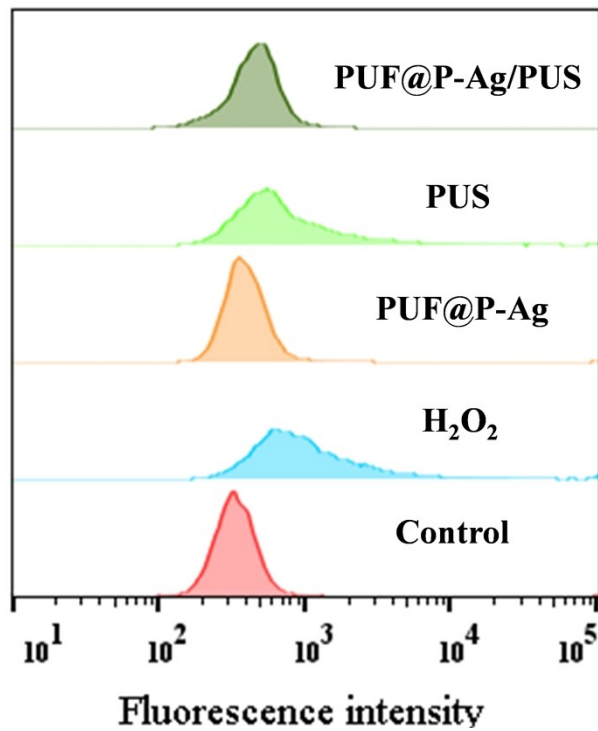

**Figure S14.** Flow cytometric analysis of intracellular ROS levels in L929 fibroblasts under different treatment conditions.

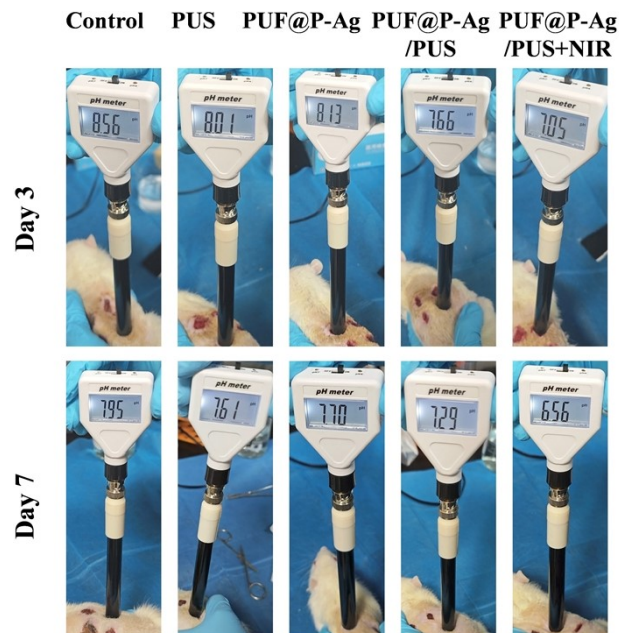

**Figure S15.** Representative photographs of wound surface pH on day 3 and day 7 for different groups.
